1 **Population genomics of pneumococcal carriage in Massachusetts children following PCV-**

2 **13 introduction**

3 **Mitchell PK<sup>1</sup>, Azarian T<sup>1</sup>, Croucher NJ, Callendrello A<sup>1</sup>, Thompson CM<sup>1</sup>, Pelton SI<sup>2</sup>,**

4 **Lipsitch M<sup>1</sup>, WP Hanage<sup>1</sup>**

5 **1** Center for Communicable Disease Dynamics, Department of Epidemiology, T.H. Chan School of Public  
6 Health, Harvard University, Boston, MA; **2** MRC Centre for Outbreak Analysis and Modelling, Department  
7 of Infectious Disease Epidemiology, Imperial College London, London, W2 1PG, UK; **3** Division of  
8 Pediatric Infectious Diseases, Maxwell Finland Laboratory for Infectious Diseases, Boston Medical  
9 Center, Boston, MA

10

11 Patrick Mitchell [mitchell.patrick.k@gmail.com](mailto:mitchell.patrick.k@gmail.com)

12 Taj Azarian [Tazarian@hsph.harvard.edu](mailto:Tazarian@hsph.harvard.edu)

13 Nick J Croucher [n.croucher@imperial.ac.uk](mailto:n.croucher@imperial.ac.uk)

14 Alanna Callendrello [alcallendrello@gmail.com](mailto:alcallendrello@gmail.com)

15 Claudette M Thompson [cthompso@hsph.harvard.edu](mailto:cthompso@hsph.harvard.edu)

16 Stephen I Pelton [spelton@bu.edu](mailto:spelton@bu.edu)

17 Marc Lipsitch [mlipsitc@hsph.harvard.edu](mailto:mlipsitc@hsph.harvard.edu)

18 Bill Hanage [whanage@hsph.harvard.edu](mailto:whanage@hsph.harvard.edu)

19

20

21 **Corresponding Author:**

22 Bill Hanage

23 Center for Communicable Disease Dynamics,

24 Harvard T.H. Chan School of Public Health,

25 677 Huntington Avenue, Suite 506, Boston, MA 02115

26 [whanage@hsph.harvard.edu](mailto:whanage@hsph.harvard.edu)

## 27 **Background**

28 The 13-valent pneumococcal conjugate vaccine (PCV-13) was introduced in the United States in  
29 2010. Using a large pediatric carriage sample collected from shortly after the introduction of  
30 PCV-7 to several years after the introduction of PCV-13, we investigate alterations in the  
31 composition of the pneumococcal population following the introduction of PCV-13, evaluating  
32 the extent to which the post-vaccination non-vaccine type (NVT) population mirrors that from  
33 prior to vaccine introduction and the effect of PCV-13 on vaccine type lineages.

## 34 **Methods and Findings**

35 Draft genome assemblies from 736 newly sequenced and 616 previously published  
36 pneumococcal carriage isolates from children in Massachusetts between 2001 and 2014 were  
37 analyzed. Isolates were classified into one of 22 sequence clusters (SCs) on the basis of their  
38 core genome sequence. We calculated the SC diversity for each sampling period as the  
39 probability that any two randomly drawn isolates from that period belong to different SCs. The  
40 sampling period immediately after the introduction of PCV-13 (2011) was found to have higher  
41 diversity than preceding (2007) or subsequent (2014) sampling periods (Simpson's D 2007:  
42 0.915 95% CI [0.901, 0.929]; 2011: 0.935 [0.927, 0.942]; 2014: 0.912 [0.901, 0.923]). Amongst  
43 NVT isolates, we found the distribution of SCs in 2011 to be significantly different from that in  
44 2007 or 2014 (Fisher's Exact Test  $p=0.018$ ,  $0.0078$ ), but did not find a difference comparing  
45 2007 to 2014 (Fisher's Exact Test  $p=0.24$ ), indicating greater similarity between samples  
46 separated by a longer time period than between samples from closer time periods. We also found  
47 changes in the accessory gene content of the NVT population between 2007 and 2011 to have  
48 been reduced by 2014. Amongst the new serotypes targeted by PCV-13, four were present in our  
49 sample. The proportion of our sample composed of PCV-13-only vaccine serotypes 19A, 6C,

50 and 7F decreased between 2007 and 2014, but no such reduction was seen for serotype 3. We  
51 did, however, observe differences in the genetic composition of the pre- and post-PCV-13  
52 serotype 3 population. Our isolates were collected during discrete sampling periods from a small  
53 geographic area, which may limit the generalizability our findings.

#### 54 **Conclusion**

55 Pneumococcal diversity increased immediately following the introduction of PCV-13, but  
56 subsequently returned to pre-vaccination levels. This is reflected in the distribution of NVT  
57 lineages, and, to a lesser extent, their accessory gene frequencies. As such, there may be a period  
58 during which the population is particularly disrupted by vaccination before returning to a more  
59 stable distribution. The persistence and shifting genetic composition of serotype 3 is a concern  
60 and warrants further investigation.

## 61 INTRODUCTION

62 *Streptococcus pneumoniae* is a common bacterial colonizer of the human nasopharynx,  
63 particularly among children<sup>1</sup>. In Massachusetts, it has consistently been found in approximately  
64 30% of children under the age of 7 between 2001 and 2011<sup>2</sup>. While colonization rarely  
65 progresses beyond asymptomatic carriage, the ubiquity of the pneumococcus leads to a  
66 substantial burden of disease, causing an estimated 4 million disease episodes, including 445,000  
67 hospitalizations and 22,000 deaths in the United States in 2004<sup>3</sup>.

68 Conjugate vaccination has been a major advance in the reducing pneumococcal disease.  
69 The seven-valent pneumococcal conjugate vaccine (PCV-7), introduced in the United States in  
70 2000, was highly effective in reducing overall rates of pneumococcal disease, as vaccine type  
71 (VT) pneumococci were responsible for the vast majority of cases<sup>4-6</sup>. Carriage of vaccine  
72 serotypes also declined, though overall carriage prevalence remained roughly constant due to  
73 serotype replacement<sup>2,7,8</sup>.

74 Despite lower overall rates of pneumococcal disease, increases were seen in the incidence  
75 of disease due to the replacement non-vaccine type (NVT) population. Serotype 19A in  
76 particular became a significant cause of invasive disease<sup>5,9,10</sup>. The thirteen-valent vaccine (PCV-  
77 13), introduced in 2010, extended coverage to six additional serotypes, including 19A, beyond  
78 those included in PCV-7, and has resulted in further reductions in pneumococcal disease<sup>11</sup>. As  
79 with PCV-7, however, overall carriage prevalence has not changed substantially<sup>2</sup>. Worryingly,  
80 serotype 3, a highly invasive serotype included in PCV-13, appears to have not declined as the  
81 other newly added serotypes have<sup>2,11-14</sup>. Given the potential for disease to arise both from  
82 replacement NVTs and persistent VTs, it remains important to monitor changes to the  
83 pneumococcal carriage population.

84 Pediatric pneumococcal carriage in Massachusetts has been extensively studied since  
85 shortly after the introduction of PCV-7<sup>7</sup>. The effects of vaccination can be seen both in the  
86 prevalence of specific lineages as well as in broader population metrics. The apparent effects of  
87 vaccination are variable depending on how the population is characterized and the timescale over  
88 which it is examined. Serotype diversity was found to have increased then stabilized following  
89 the introduction of PCV-7<sup>15</sup>, reflecting the selective impact of vaccines and the period while  
90 carriage replacement was taking place. Interestingly, minimal changes were found when  
91 comparing the presence and absence of specific pneumococcal genes in this population between  
92 2001 and 2007, suggesting that the overall genetic composition of the population was not much  
93 changed other than in one of the loci conferring vaccine serotype 6B<sup>16</sup>. Another study  
94 considering multilocus sequence type (MLST) profiles found no significant change in diversity  
95 or population composition in the immediate aftermath of PCV-13<sup>17</sup>. With more time elapsed  
96 since PCV-13 introduction, it is possible to evaluate the longer-term effects of this vaccine.

97 Here we examine population-scale genetic changes in carriage pneumococci amongst  
98 children in Massachusetts since the introduction of PCV-13. Using genomic sequencing data for  
99 isolates collected between 2000 and 2014, we analyze alterations to the clonal composition,  
100 defined on the basis of core genome variability, and gene content of the pneumococcal NVT  
101 population following the introduction of PCV-13. Additionally, we evaluate whether serotype 3  
102 pneumococci have declined and how they have changed through this time period.

103

## 104 **METHODS**

### 105 **Sample Collection**

106 Pneumococcal isolates were collected from nasopharyngeal swabs of children in  
107 Massachusetts between October and April of 2000-01, 2003-04, 2006-07, 2008-09, 2010-11 and  
108 2013-14 as previously described<sup>2,7,8</sup>. Each sampling season is referred to by the later year.  
109 Pneumococcal genomes from the 2001, 2004, and 2007 sampling periods were previously  
110 published and read data for these were obtained from ENA<sup>16</sup>. Isolates from 2009 through 2014  
111 were sequenced from NexteraXT genomic libraries analyzed on an Illumina MiSeq to produce  
112 paired-end 2x150 bp reads with a minimum depth of coverage of 30X.

### 113 **Genomic Processing**

114 Draft assemblies were constructed using SPAdes v3.10 and annotated using Prokka  
115 v1.11<sup>18,19</sup>. Assemblies not between 1.9 and 2.3 Mb were excluded from further analysis, as were  
116 those that produced fewer than 1900 annotated coding sequences (CDS). Roary v3.10.0 was then  
117 used to identify core (present in >99% of isolates) and accessory genes and to generate a core  
118 gene alignment<sup>20</sup>.

### 119 **Typing**

120 Serotype was identified using the Quellung reaction as previously described and reported  
121 for all but the 2014 sample<sup>16,17,21</sup>. Serotypes were checked using SRST2 v0.2.0 and a database  
122 constructed from 91 published sequences of the pneumococcal capsule biosynthetic locus<sup>22-24</sup>.

### 123 **Phylogenetic Analysis**

124 The core genome alignment generated by Roary was used to construct a phylogeny using  
125 FastTree v2.1.10<sup>25</sup>. In order to identify clusters of related sequences (Sequence Clusters - SCs),  
126 three iterations of hierBAPS were run on the core genome alignment, setting the maximum  
127 cluster depth to 1 and maximum number of clusters to 30, 40, and 50<sup>26</sup>.

## 128 **Sequence Cluster Diversity**

129 In order to determine the potential effect of PCV-13 on diversity in this population, we  
130 calculated Simpson's D for each sampling period, for sequence clusters. This value, which  
131 represents the probability that two randomly drawn isolates from a given sampling period belong  
132 to different SCs, was calculated as  $D = \frac{N}{N-1} (1 - \sum_{i=1}^m x_i^2)$ , where  $x = \frac{n_i}{N}$ , the fraction of isolates  
133 in that year belonging to sequence cluster  $i$  and  $\frac{N}{N-1}$  is a correction for finite sample size<sup>27</sup>.  
134 Following an earlier analysis of serotype diversity in this population, Welch's t-test was used to  
135 compare the 2007 and 2011 populations and the 2011 and 2014 populations in order to test  
136 whether SC diversity changed following the introduction of PCV-13<sup>15</sup>. The polyphyletic SC was  
137 excluded from these calculations.

138 An increase in diversity would be expected if common lineages become more rare and  
139 rare lineages become more common. To estimate the expected change in diversity we would  
140 observe if there were a smooth transition between the 2007 and 2014 population, a series of  
141 composite diversities were calculated in which the proportion belonging to each SC was a  
142 weighted combination of the 2007 and 2014 value for that SC, with the weights for the two years  
143 summing to 1. The sample size correction factor,  $\frac{N}{N-1}$ , was similarly weighted.

144 The proportion of the population belonging to each SC and their rank order in the  
145 population were determined. As diversity increases, the shape of this distribution would be

146 expected to flatten, with the most common lineages decreasing and the least common lineages  
147 increasing.<sup>28</sup> In order to compare this distribution from the 2007 and 2014 sampling periods with  
148 that from 2011, the frequency of each SC was plotted against its rank and overlaid with the  
149 distribution from 2011. In order to determine which SCs became more or less common following  
150 the introduction of PCV13, we conducted a Fisher's exact test for each SC comparing its  
151 frequency between the 2007 and 2014 samples.

## 152 **NVT Composition**

153 To determine the clonal composition of the pre- and post-PCV-13 NVT population, the  
154 proportion of the NVT population belonging to each of the SCs identified by hierBAPS was  
155 calculated for 2007, 2011, and 2014. For the purpose of these analyses, serotype 6C was  
156 considered a PCV-13 type due to its cross-reactivity with serotype 6A<sup>29,30</sup>. Fisher's exact test  
157 was used to determine whether these proportions varied between each pairwise combination of  
158 these three sampling periods.

159 We then sought to determine if the gene content of the NVT population varied between  
160 sampling periods before and after the introduction of PCV-13. Logistic models were used  
161 evaluate the extent to which individual genes became more or less common between 2007 and  
162 2014, as well as between 2007 and 2011. Genes were excluded if they were universally present  
163 or absent in either sampling period or present or absent in fewer than 5 total isolates between the  
164 three sampling periods. For the set of genes included in both models, we calculated a linear fit  
165 comparing the regression coefficients corresponding to the time periods from 2007 to 2011 and  
166 2007 to 2014.



167 In order to determine whether changes in the gene content of the NVT population from  
168 2007 to 2011 continued, stabilized, or reversed from 2011 to 2014, we compared the observed  
169 data to hypothetical scenarios in which the 2014 population was purely reflective of the  
170 population from either the earlier sampling periods. To do this, we drew with replacement a  
171 sample of the same size as the 2014 population from either the 2007 or 2011 population. Twenty  
172 resampled populations were generated from each of 2007 and 2011, then used in place of the true  
173 2014 population in the previous regression analyses. This process was repeated for an additional  
174 twenty resampled populations drawn from the true 2014 population in order to gauge its  
175 variability. This enabled us to evaluate the gene content of the 2014 population in relation to  
176 what would be expected if there was no overall change either from 2007 or from 2011.

### 177 **Evaluation of Serotype 3**

178 Previous studies have noted that PCV-13 may not be as effective against serotype 3 as it  
179 is against the other serotypes included<sup>2,11,13,14</sup>. We compared the proportion of the pneumococcal  
180 population composed of serotype 3 between 2007, 2011, and 2014 in relation to the other three  
181 PCV-13 serotypes present in our sample, 19A, 7F, and 6C. We identified MLST profile of  
182 serotype 3 isolates using as previously described<sup>16</sup>. We then used RAxML to construct a  
183 phylogenetic tree based on the core genome of serotype 3 isolates to determine if the pre- and  
184 post-PCV-13 populations were genetically distinct<sup>31</sup>. To assess nucleotide and amino acid  
185 variation among capsular polysaccharide (CPS) loci, we mapped reads to the *S. pneumoniae*  
186 OXC141 serotype 3 reference strain (NC\_017592) using SMALT v0.7.6. Single nucleotide  
187 polymorphisms (SNPs) were identified using SAMtools v1.3.1<sup>32</sup>. The CPS region spanning  
188 nucleotides 343,104-356,408 (*dexB* – *aliA*) was abstracted and investigated for mutations.  
189 Further, RAxML was used to construct a phylogeny of the CPS region.

## 190 **RESULTS**

### 191 **Sample**

192 A total of 1,352 isolates were included in the final analysis. The core genome consists of  
193 1,000 genes found in at least 99% of isolates, producing an alignment 885 kb in length. A total of  
194 10,941 genes were identified. Setting the maximum number of hierBAPS clusters to 30 and 40  
195 produced identical results, with 21 clusters identified. With the maximum number of clusters set  
196 to 50, an additional cluster was identified and another cluster was expanded. This resulted in 22  
197 SCs, 21 of which were monophyletic and ranged in size from 14 to 177 isolates. The other, SC1,  
198 contained 150 isolates belonging to multiple small clades or individual leaves throughout the tree  
199 and should be interpreted as containing all lineages that could not be grouped, other than on the  
200 basis of their lack of similarity to any other cluster [Fig 1].

### 201 **Diversity**

202 Sequence cluster diversity was calculated for each year using Simpson's D, excluding the  
203 polyphyletic cluster SC1. Diversity was significantly higher in 2011, the first sampling period  
204 following the introduction of PCV13, than it was in either 2007 or 2014, the adjacent periods for  
205 which data were available (2007  $p=0.018$ , 2014  $p=0.00098$ ) [Fig 2a]. A similar increase was  
206 observed after the introduction of PCV-7. The weighted diversity estimate displayed the  
207 expected increase over either the 2007 or 2014 values, but was never as high as the diversity  
208 calculated for 2011 [Fig 2b].

209 After Bonferroni correction, only 3 SCs (SC3, SC9, and SC20) changed significantly in  
210 their share of the pneumococcal population between 2007 and 2014 (Fisher's exact test  
211  $p=0.0021$ ,  $0.0022$ , and  $4.5 \times 10^{-6}$ , respectively). SC3 became more common, increasing from 5.8%

212 of the 2007 sample to 13.4% of the 2014 sample, with serogroups 23 and 15 coming to  
213 predominate over serogroup 6. Both SCs 9 and 20 are primarily composed of serotypes against  
214 which PCV-13 afforded protection (7F and 6C, respectively) and were completely absent in the  
215 2014 sample.

216 The overall shape of the frequency distribution was slightly flatter in 2011 as compared  
217 to 2007 and 2014, as would be expected from the higher diversity in that sampling period.  
218 Relatively rare SCs in particular were more common in the 2011 sample than the adjacent  
219 periods [Fig 2c,d].

## 220 **NVT Composition**

221 Non-PCV-13 types increased from 66.5% of the pneumococcal population in 2007  
222 sampling period to 92.3% in the 2014 sampling period. Fifteen SCs had at least 1 NVT isolate.  
223 There was no significant difference between the SC distribution amongst NVTs in 2007 and  
224 2014 (Fisher's exact test  $p=0.24$ ). There was, however, a significant difference between 2007  
225 and 2011 ( $p=0.0018$ ) and between 2011 and 2014 ( $p=0.0078$ ), indicating a bounce-back effect in  
226 which the population was disrupted in 2011 but returned to its pre-vaccination state by 2014.  
227 Correspondingly, many of the common SCs that showed a distinct increase in their prevalence in  
228 the NVT population between 2007 and 2011 decreased from 2011 to 2014 while those that  
229 decreased between 2007 and 2011 increased from 2011 to 2014. [Fig 3].

230 This bounce-back is partially reflected by the trend in gene content over time. The linear  
231 fit comparing the 2007-2011 and 2007-2014 regression coefficients for each gene had a slope of  
232 0.62, indicating less overall change between 2007 and 2014 than between 2007 and 2011. This  
233 slope fell between those from hypothetical 2014 populations drawn from either 2007 or 2011,

234 which clustered around a slope of 0 and 1, respectively [Fig. 4]. This indicates that while the  
235 direction in which genes changed in frequency from 2007 to 2011 was generally preserved  
236 through 2014, the trend was partially counteracted between 2011 and 2014 with genes returning  
237 closer to their 2007 levels prior to the introduction of PCV-13.

### 238 **Persistence of Serotype 3**

239 In order to evaluate whether the whether the new serotypes included in PCV-13  
240 decreased following its introduction, we conducted a Fisher's exact test comparing the 2007 and  
241 2014 carriage share of serotypes 19A, 6C, 7F, and 3. While serotypes 19A, 6C and 7F all showed  
242 significant reductions between the two time periods ( $p < 0.0001$ ,  $p = 0.00014$ ,  $p = 0.0011$ ,  
243 respectively), serotype 3 had no such change ( $p = 0.46$ ) [Fig 5].

244 To test if the persistence of serotype 3 may be related to some genetic factor, we assessed  
245 population structure and CPS nucleotide variation. All of the serotype 3 isolates clustered in the  
246 same SC and were MLST sequence type (ST) 180 belonging to the Netherlands<sup>3</sup>-31 (PMEN31)  
247 clone CC180. While all isolates clustered into the same SC, there was a distinct bifurcation in the  
248 phylogeny [Fig 6]. Of the 28 serotype 3 isolates, 16 fell into one subclade and 12 into the other.  
249 In the larger subclade, 4 isolates (25%) are from 2011 or 2014, after the introduction of PCV-13.  
250 The other subclade contains 11 (92%) post-PCV-13 isolates ( $\chi^2 p = 0.0018$ ). Further assessment of  
251 CPS showed low nucleotide diversity [mean pairwise SNP distance: 1.5 (S.E. 0.7)] and only four  
252 polymorphic amino acids, none of which segregated the subclades. However, the CPS phylogeny  
253 recapitulated the bifurcation in the core genome phylogeny, with all isolates belonging to the  
254 post-PCV-13 subclade displaying as highly clustered.

255 **DISCUSSION**

256 Here we have analyzed a sample of carriage pneumococci collected in Massachusetts  
257 between the winters of 2000-01 and 2013-14, focusing primarily on changes occurring following  
258 the introduction of PCV-13. Using genomic data, we find that the NVT population in the most  
259 recent sampling period more closely reflects that of our last full pre-PCV13 sample than our first  
260 post PCV-13 sample. This suggests a return to equilibrium following disruption by vaccine,  
261 which is consistent with observations made following the introduction of PCV-7 in the same  
262 population<sup>33</sup>, but now with the added resolution offered by genomic data. We also find that  
263 serotype 3 CC180 has been more persistent than other serotypes added for PCV-13, but a  
264 different subclade of this lineage now predominates.

265 Given the value of being able to predict the composition of the pneumococcal population  
266 following PCV use, the pattern observed amongst the NVTs is quite interesting. Our 2014  
267 sample appears to be broadly a reflection of the 2007 sample, but 2011 is unlike either. As such,  
268 it is possible that the pre-vaccine NVT population may be a good predictor of the post-vaccine  
269 population, but that the disruption caused by vaccine introduction can temporarily interrupt this  
270 pattern. Some of this could be due to variation in the age of children who have been vaccinated,  
271 which should increase over time as vaccinated children age. The observed increase in SC  
272 diversity in the immediate post-vaccine period, with the most common lineages making up a  
273 smaller proportion of the total population, may provide an enhanced opportunity for rarer  
274 lineages to increase. Considering this scenario, lineages such as SCs 3, 14, and 19 (serotypes  
275 23A/15BC, 21 and 33F, respectively), may have a similar trajectory to that of serotype 19A  
276 ST320 after PCV-7<sup>5,9,10,34</sup>. It has also recently been suggested that negative frequency dependent  
277 selection on elements of the accessory genome could be responsible for structuring the

278 pneumococcal population at both spatial and temporal scales<sup>35</sup>. Further observation will help  
279 determine the role of this and whether these or other lineages become more substantial  
280 contributors to both carriage and invasive disease.

281 Previous studies have indicated that PCV-13 may not be as effective against serotype 3 as  
282 it is against other included serotypes<sup>2,11,13,14</sup>. The shift we observed in the serotype 3 CC180  
283 population following the introduction of PCV-13 may reflect a similar phenomenon to that  
284 leading to the recognition of serotype 6C as distinct from 6A following the introduction of PCV-  
285 7<sup>36,37</sup>. The dominant lineage pre-PCV-13 was also more homogenous (i.e., less diverse) than the  
286 post-vaccination population, so it is possible that the immunity generated against serotype 3 by  
287 PCV-13 is narrowly tailored to that subset of the population. At present, little genetic variation  
288 among the CPS loci was observed, suggesting an alternative explanation for the recent post-  
289 PCV-13 emergent subclade. Given its propensity for causing disease, the persistence of serotype  
290 3 despite its inclusion in PCV-13 warrants further investigation.

291 The response of the pneumococcal population to serotype-targeting conjugate vaccines  
292 may also provide insights for other pathogens for which vaccines have been targeted at or  
293 differentially affect a subset of their population. The efficacy of the RTS,S malaria vaccine  
294 appears to be partially dependent on how well the circumsporozoite protein of a given  
295 *Plasmodium* type matches that in the vaccine<sup>38</sup>. There has also been interest in understanding  
296 how the strain dynamics and epidemiology of meningococcal disease caused by the bacteria  
297 *Neisseria meningitidis* will be affected by the rollout of vaccinations against a variety of  
298 serogroups<sup>39,40</sup>. While each of these disease systems is different, there is some potential for  
299 findings in one to inform hypotheses for how others will behave.

300           Pneumococcal epidemiology has changed substantially as a result of conjugate  
301 vaccination. While PCVs have been highly effective in reducing the incidence of pneumococcal  
302 disease<sup>4,5,11</sup>, continued vigilance is necessary to monitor for, and respond to, the emergence of  
303 potentially dangerous lineages not protected against by current vaccine formulations.

304   **Competing interests**

305 M.L. has consulted for Pfizer, Affinivax and Merck and has received grant support not related to  
306 this paper from Pfizer and PATH Vaccine Solutions. W.P.H., M.L. and N.J.C. have consulted for  
307 Antigen Discovery Inc. S.I.P. has investigator initiated research funding (through Boston  
308 Medical Center) from Pfizer and Merck Vaccines. He has also received honorarium from Pfizer,  
309 GSK bio, Merck Vaccines, and Seqirus.

310 **References**

- 311 1. Mehr S, Wood N. Streptococcus pneumoniae – a review of carriage, infection, serotype  
312 replacement and vaccination. *Paediatr Respir Rev*. January 2012:2-8.  
313 doi:10.1016/j.prrv.2011.12.001.
- 314 2. Lee GM, Kleinman K, Pelton SI, et al. Impact of 13-valent pneumococcal conjugate  
315 vaccination on Streptococcus pneumoniae carriage in young children in Massachusetts. *J*  
316 *Pediatric Infect Dis Soc*. 2014;3(1):23-32. doi:10.1093/jpids/pit057.
- 317 3. Huang SS, Johnson KM, Ray GT, et al. Healthcare utilization and cost of pneumococcal  
318 disease in the United States. *Vaccine*. 2011;29(18):3398-3412.  
319 doi:10.1016/j.vaccine.2011.02.088.
- 320 4. Whitney CG, Farley MM, Hadler J, et al. Decline in Invasive Pneumococcal Disease after  
321 the Introduction of Protein-Polysachharide Conjugate Vaccine. *N Engl J Med*.  
322 2003;348(18):1737-1746.
- 323 5. Pilishvili T, Lexau C, Farley MM, et al. Sustained reductions in invasive pneumococcal  
324 disease in the era of conjugate vaccine. *J Infect Dis*. 2010;201(1):32-41.  
325 doi:10.1086/648593.
- 326 6. Hausdorff WP, Bryant J, Paradiso PR, Siber GR. Which pneumococcal serogroups cause  
327 the most invasive disease: implications for conjugate vaccine formulation and use, part I.  
328 *Clin Infect Dis*. 2000;30(1):100-121. doi:10.1086/313608.
- 329 7. Huang SS, Platt R, Rifas-Shiman SL, Pelton SI, Goldmann D, Finkelstein J a. Post-PCV7  
330 changes in colonizing pneumococcal serotypes in 16 Massachusetts communities, 2001  
331 and 2004. *Pediatrics*. 2005;116(3):e408-13. doi:10.1542/peds.2004-2338.



- 332 8. Huang SS, Hinrichsen VL, Stevenson AE, et al. Continued Impact of Pneumococcal  
333 Conjugate Vaccine on Carriage in Young Children. *Pediatrics*. 2009;124(1):e1-e11.  
334 doi:10.1542/peds.2008-3099.
- 335 9. Moore MR, Gertz RE, Woodbury RL, et al. Population snapshot of emergent  
336 *Streptococcus pneumoniae* serotype 19A in the United States, 2005. *J Infect Dis*.  
337 2008;197(7):1016-1027. doi:10.1086/528996.
- 338 10. Pelton SI, Huot H, Finkelstein J a, et al. Emergence of 19A as virulent and multidrug  
339 resistant *Pneumococcus* in Massachusetts following universal immunization of infants  
340 with pneumococcal conjugate vaccine. *Pediatr Infect Dis J*. 2007;26(6):468-472.  
341 doi:10.1097/INF.0b013e31803df9ca.
- 342 11. Moore MR, Link-Gelles R, Schaffner W, et al. Effect of use of 13-valent pneumococcal  
343 conjugate vaccine in children on invasive pneumococcal disease in children and adults in  
344 the USA: analysis of multisite, population-based surveillance. *Lancet Infect Dis*.  
345 2015;15(3):301-309. doi:10.1016/S1473-3099(14)71081-3.
- 346 12. Yildirim I, Hanage WP, Lipsitch M, et al. Serotype specific invasive capacity and  
347 persistent reduction in invasive pneumococcal disease. *Vaccine*. 2010;29(2):283-288.  
348 doi:10.1016/j.vaccine.2010.10.032.
- 349 13. Andrews NJ, Waight PA, Burbidge P, et al. Serotype-specific effectiveness and correlates  
350 of protection for the 13-valent pneumococcal conjugate vaccine: a postlicensure indirect  
351 cohort study. *Lancet Infect Dis*. 2014;14(9):839-846. doi:10.1016/S1473-3099(14)70822-  
352 9.
- 353 14. Harboe Z, Dalby T. Impact of 13-Valent Pneumococcal Conjugate Vaccination in

- 354 Invasive Pneumococcal Disease Incidence and Mortality. *Clin Infect Dis*. 2014;59:1066-  
355 1073. doi:10.1093/cid/ciu524.
- 356 15. Hanage WP, Finkelstein JA, Huang SS, et al. Evidence that pneumococcal serotype  
357 replacement in Massachusetts following conjugate vaccination is now complete.  
358 *Epidemics*. 2010;2(2):80-84. doi:10.1016/j.epidem.2010.03.005.
- 359 16. Croucher NJ, Finkelstein JA, Pelton SI, et al. Population genomics of post-vaccine  
360 changes in pneumococcal epidemiology. *Nat Genet*. 2013;45(6):656-663.  
361 doi:10.1038/ng.2625.
- 362 17. Chang Q, Stevenson AE, Croucher NJ, et al. Stability of the pneumococcal population  
363 structure in Massachusetts as PCV13 was introduced. *BMC Infect Dis*. 2015;15:68.  
364 doi:10.1186/s12879-015-0797-z.
- 365 18. Bankevich A, Nurk S, Antipov D, et al. SPAdes: a new genome assembly algorithm and  
366 its applications to single-cell sequencing. *J Comput Biol*. 2012;19(5):455-477.  
367 doi:10.1089/cmb.2012.0021.
- 368 19. Seemann T. Prokka: rapid prokaryotic genome annotation. *Bioinformatics*.  
369 2014;30(14):2068-2069. doi:10.1093/bioinformatics/btu153.
- 370 20. Page AJ, Cummins CA, Hunt M, et al. Roary: Rapid large-scale prokaryote pan genome  
371 analysis. *Bioinformatics*. 2015;31(22):btv421. doi:10.1093/bioinformatics/btv421.
- 372 21. Hanage WP, Bishop CJ, Huang SS, et al. Carried pneumococci in Massachusetts children:  
373 the contribution of clonal expansion and serotype switching. *Pediatr Infect Dis J*.  
374 2011;30(4):302-308. doi:10.1097/INF.0b013e318201a154.
- 375 22. Inouye M, Dashnow H, Raven L-A, et al. SRST2: Rapid genomic surveillance for public

- 376 health and hospital microbiology labs. *Genome Med.* 2014;6(11):90. doi:10.1186/s13073-  
377 014-0090-6.
- 378 23. Bentley SD, Aanensen DM, Mavroidi A, et al. Genetic analysis of the capsular  
379 biosynthetic locus from all 90 pneumococcal serotypes. *PLoS Genet.* 2006;2(3):e31.  
380 doi:10.1371/journal.pgen.0020031.
- 381 24. Park IH, Park S, Hollingshead SK, Nahm MH. Genetic basis for the new pneumococcal  
382 serotype, 6C. *Infect Immun.* 2007;75(9):4482-4489. doi:10.1128/IAI.00510-07.
- 383 25. Price MN, Dehal PS, Arkin AP. FastTree: Computing Large Minimum Evolution Trees  
384 with Profiles instead of a Distance Matrix. *Mol Biol Evol.* 2009;26(7):1641-1650.  
385 doi:10.1093/molbev/msp077.
- 386 26. Cheng L, Connor TR, Sirén J, Aanensen DM, Corander J. Hierarchical and spatially  
387 explicit clustering of DNA sequences with BAPS software. *Mol Biol Evol.*  
388 2013;30(5):1224-1228. doi:10.1093/molbev/mst028.
- 389 27. Simpson EH. Measurement of Diversity. *Nature.* 1949;163:688-688.  
390 doi:10.1038/163688a0.
- 391 28. Hanage WP, Finkelstein JA, Huang SS, et al. Evidence that pneumococcal serotype  
392 replacement in Massachusetts following conjugate vaccination is now complete.  
393 *Epidemics.* 2010;2(2):80-84. doi:10.1016/j.epidem.2010.03.005.
- 394 29. Dagan R, Patterson S, Juergens C, et al. Comparative Immunogenicity and Efficacy of 13-  
395 Valent and 7-Valent Pneumococcal Conjugate Vaccines in Reducing Nasopharyngeal  
396 Colonization: A Randomized Double-Blind Trial. *Clin Infect Dis.* 2013;57(7):952-962.  
397 doi:10.1093/cid/cit428.

- 398 30. Cooper D, Yu X, Sidhu M, Nahm MH, Fernsten P, Jansen KU. The 13-valent  
399 pneumococcal conjugate vaccine (PCV13) elicits cross-functional opsonophagocytic  
400 killing responses in humans to *Streptococcus pneumoniae* serotypes 6C and 7A. *Vaccine*.  
401 2011;29(41):7207-7211. doi:10.1016/j.vaccine.2011.06.056.
- 402 31. Stamatakis A. RAxML-VI-HPC: Maximum likelihood-based phylogenetic analyses with  
403 thousands of taxa and mixed models. *Bioinformatics*. 2006;22(21):2688-2690.  
404 doi:10.1093/bioinformatics/btl446.
- 405 32. Li H, Handsaker B, Wysoker A, et al. The Sequence Alignment/Map format and  
406 SAMtools. *Bioinformatics*. 2009;25(16):2078-2079. doi:10.1093/bioinformatics/btp352.
- 407 33. Hanage WP, Fraser C, Tang J, Connor TR, Corander J. Hyper-Recombination, Diversity,  
408 and Antibiotic Resistance in *Pneumococcus*. *Science (80- )*. 2009;324(5933):1454-1457.  
409 doi:10.1126/science.1171908.
- 410 34. Hanage WP, Bishop CJ, Lee GM, et al. Clonal replacement among 19A *Streptococcus*  
411 *pneumoniae* in Massachusetts, prior to 13 valent conjugate vaccination. *Vaccine*.  
412 2011;29(48):8877-8881. doi:10.1016/j.vaccine.2011.09.075.
- 413 35. Jukka Corander, Christophe Fraser, Michael U. Gutmann, Brian Arnold, William P.  
414 Hanage, Stephen D. Bentley, Marc Lipsitch NJC. Frequency-dependent selection in  
415 vaccine-associated pneumococcal population dynamics. *Nat Ecol Evol*. October 2017:In  
416 press. doi:10.1038/s41559-017-0337-x.
- 417 36. Park IH, Moore MR, Treanor JJ, et al. Differential effects of pneumococcal vaccines  
418 against serotypes 6A and 6C. *J Infect Dis*. 2008;198:1818-1822. doi:10.1086/593339.
- 419 37. Park IH, Pritchard DG, Cartee R, Brandao A, Brandileone MCC, Nahm MH. Discovery of

- 420 a new capsular serotype (6C) within serogroup 6 of *Streptococcus pneumoniae*. *J Clin*  
421 *Microbiol.* 2007;45(4):1225-1233. doi:10.1128/JCM.02199-06.
- 422 38. Neafsey DE, Juraska M, Bedford T, et al. Genetic Diversity and Protective Efficacy of the  
423 RTS,S/AS01 Malaria Vaccine. *N Engl J Med.* 2015;373(21):2025-2037.  
424 doi:10.1056/NEJMoa1505819.
- 425 39. Halperin SA, Bettinger JA, Greenwood B, et al. The changing and dynamic epidemiology  
426 of meningococcal disease. *Vaccine.* 2012;30:26-36. doi:10.1016/j.vaccine.2011.12.032.
- 427 40. Ali O, Aseffa A, Bedru A, et al. The diversity of meningococcal carriage across the  
428 African meningitis belt and the impact of vaccination with a group a meningococcal  
429 conjugate vaccine. *J Infect Dis.* 2015;212:1298-1307. doi:10.1093/infdis/jiv211.
- 430

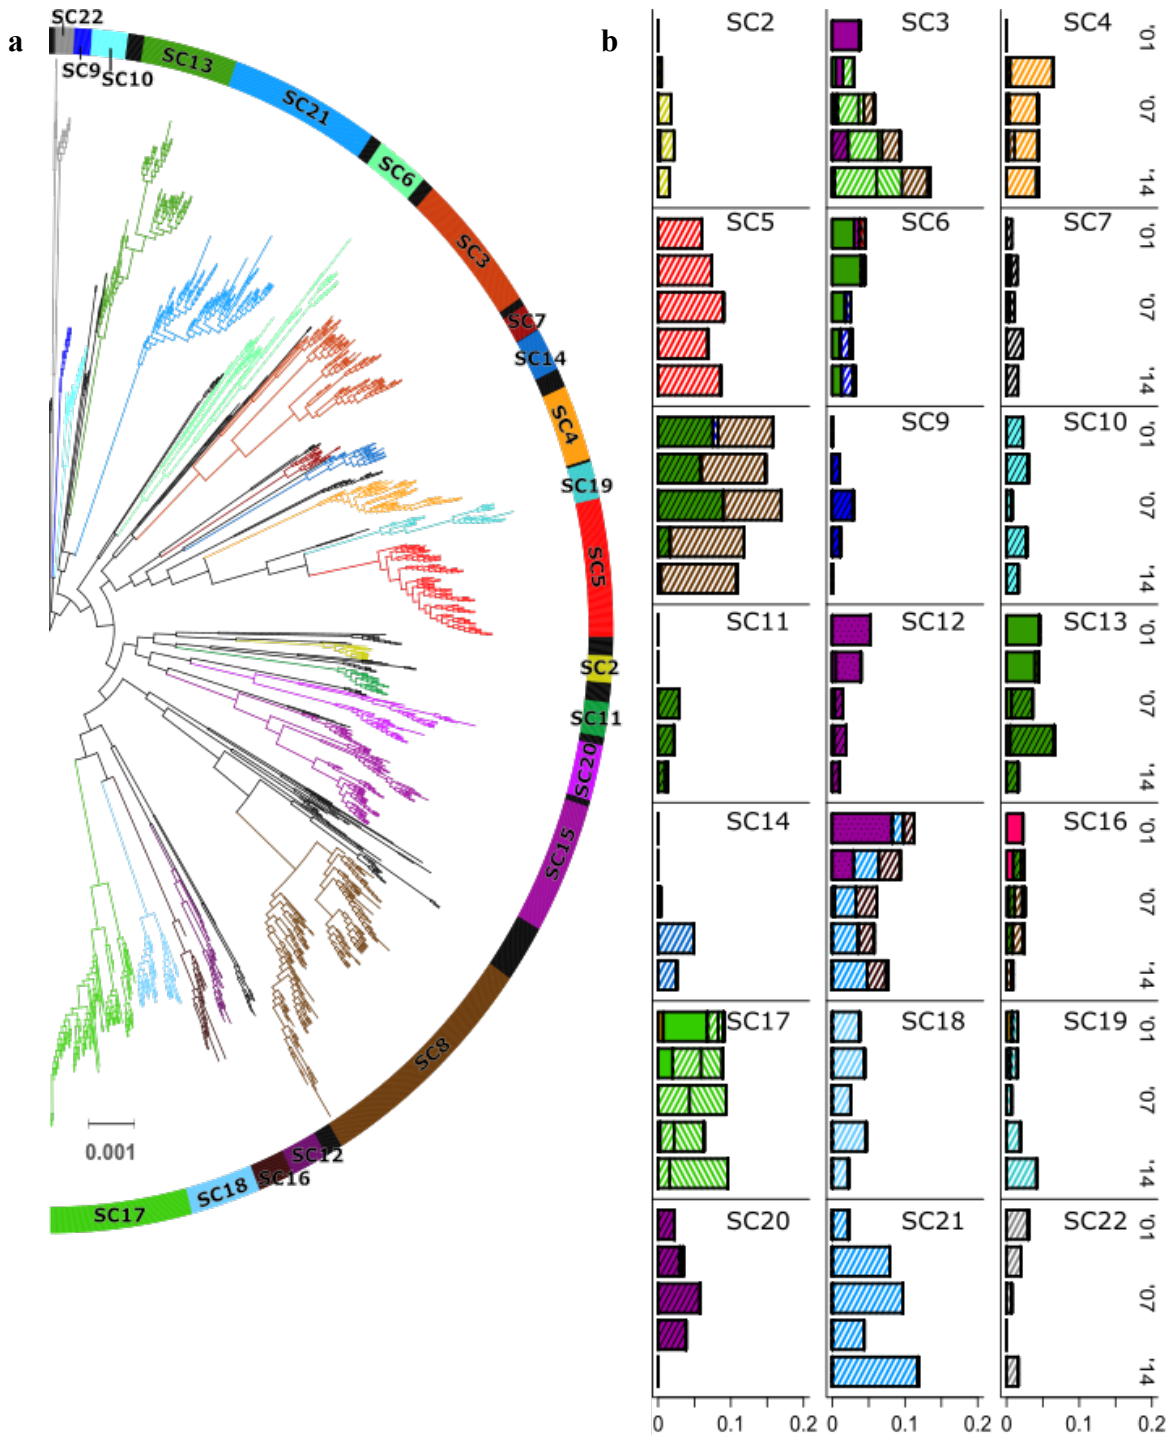

431

432

433 **Figure 1: (a)** Core genome phylogeny with SCs denoted by color. **(b)** Proportion of population  
434 in each sampling period composed of each SC, with shading indicating serotype. Solid colors are

435 PCV-7 type, solid colors with black hatching are PCV-13, and white with colored hatching are  
436 not covered by either. Serotype 6A is dotted as it is cross-reactive with 6B, a PCV-7 type, but is  
437 itself included in PCV-13.

**a**

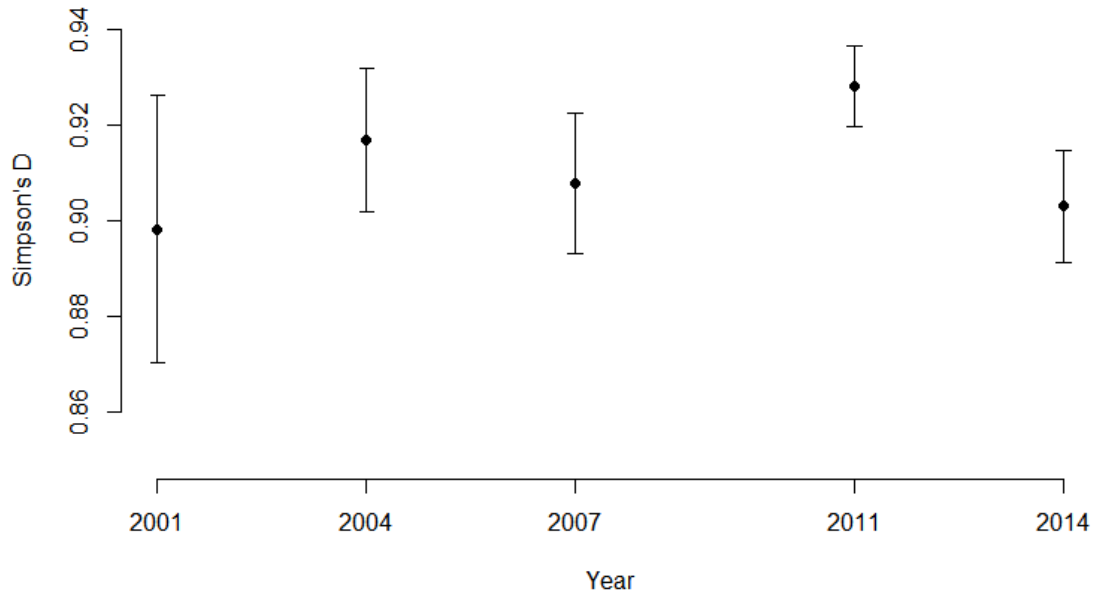

438

**b**

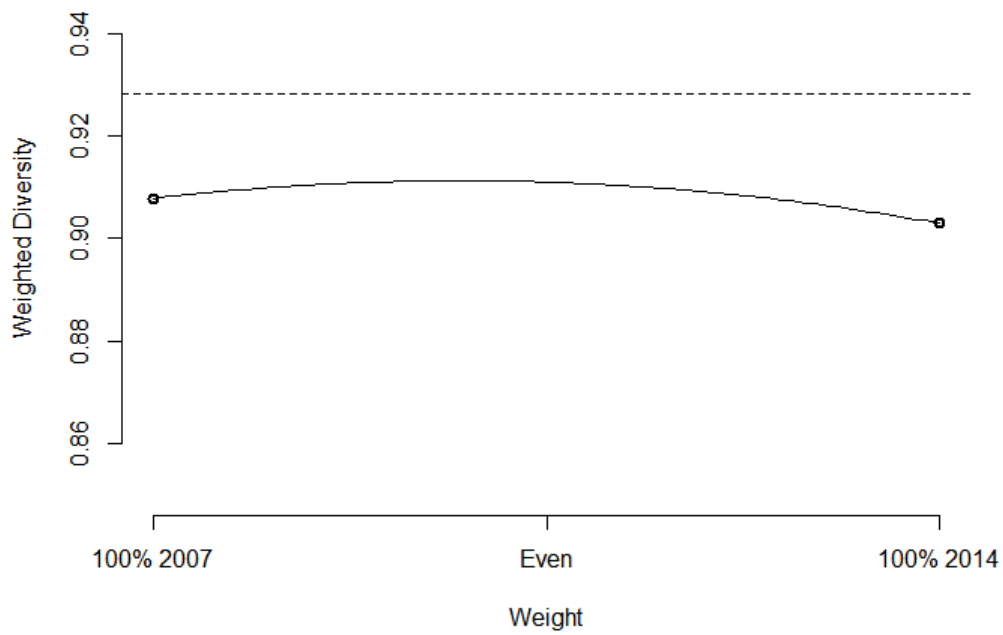

439



440 Figure 2 (continued)

441 (Continued)

442

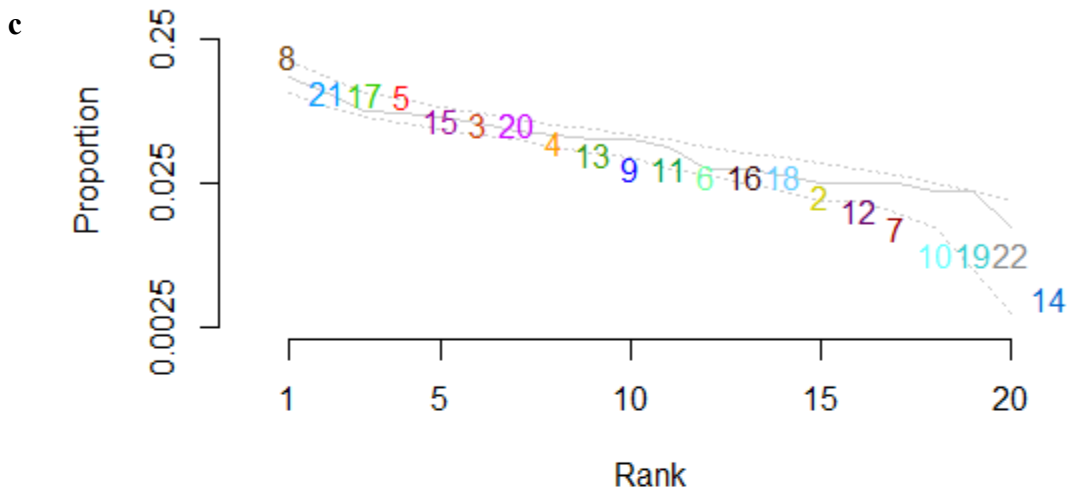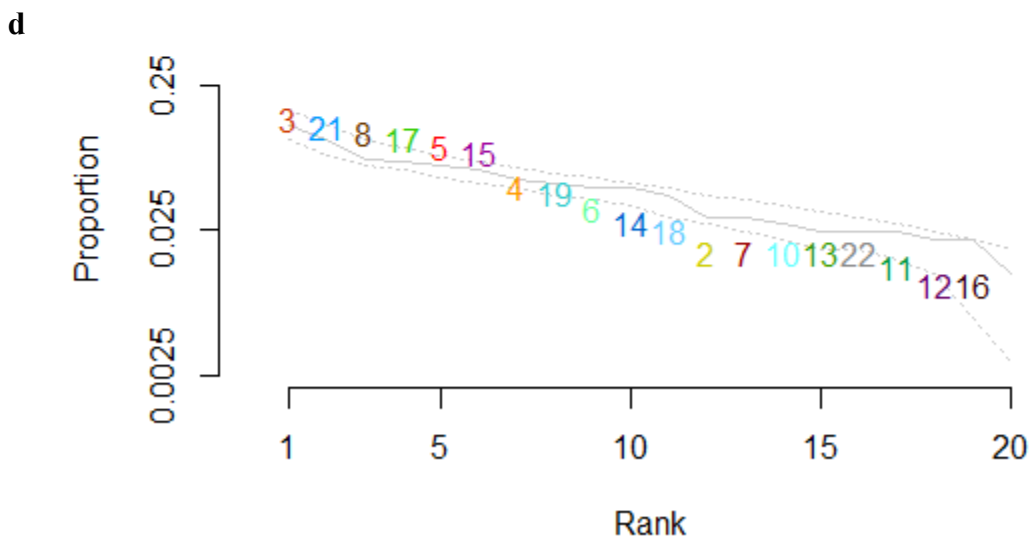

443

444 **Figure 2:** (a) Simpson's diversity of SCs, excluding the polyphyletic cluster, for each sampling

445 period. (b) Diversity calculated for hypothetical composites of 2007 and 2014 populations, with

446 2011 diversity shown as dashed line. **(c-d)** Proportion of population in **(c)** 2007 and **(d)** 2014  
447 composed of each SC, ordered by frequency. Gray line is the corresponding distribution from  
448 2011, with dotted lines representing 95% of values from 10000 random samples drawn from the  
449 2011 population.

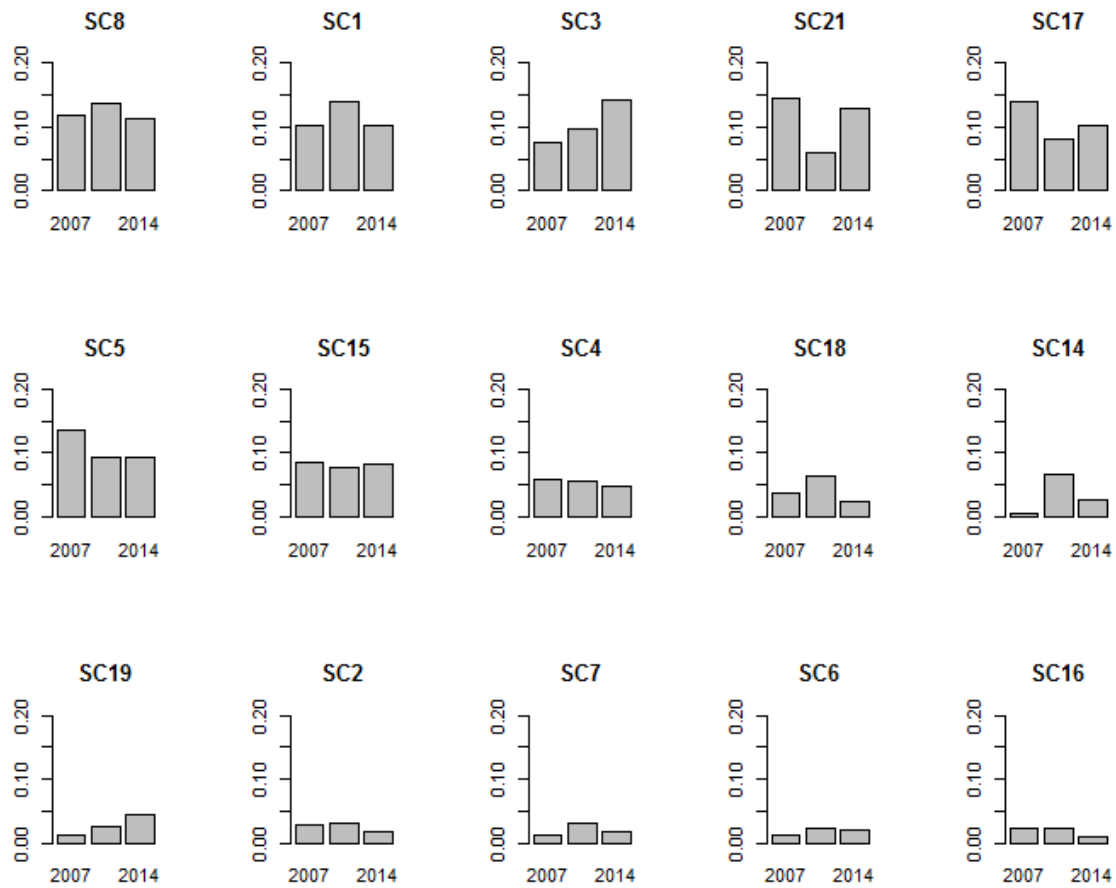

450

451 **Figure 3:** Proportion of the NVT population (i.e., those serotypes not included in PCV-13)  
452 comprised of each SC. Two additional SCs, SC11 and SC20, had a single NVT isolate and were  
453 excluded from this plot.

454

455

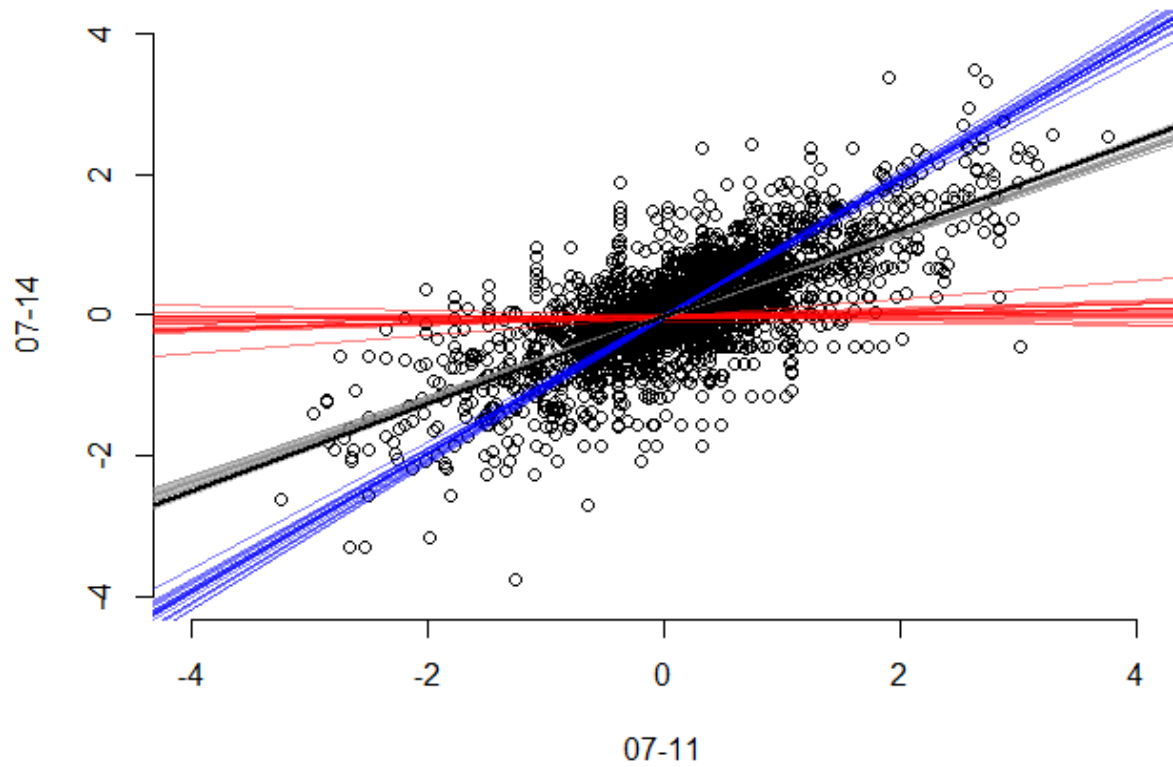

456

457 **Figure 4:** Regression coefficients comparing gene content of the NVT population from 2007 to  
458 2011 and 2014. Black circles correspond to the coefficients with individual genes, with a linear  
459 fit to the data shown in black. Fits in which a hypothetical 2014 population was drawn from  
460 either the 2007, 2011, or 2014 population are shown in red, blue, and gray, respectively.

461

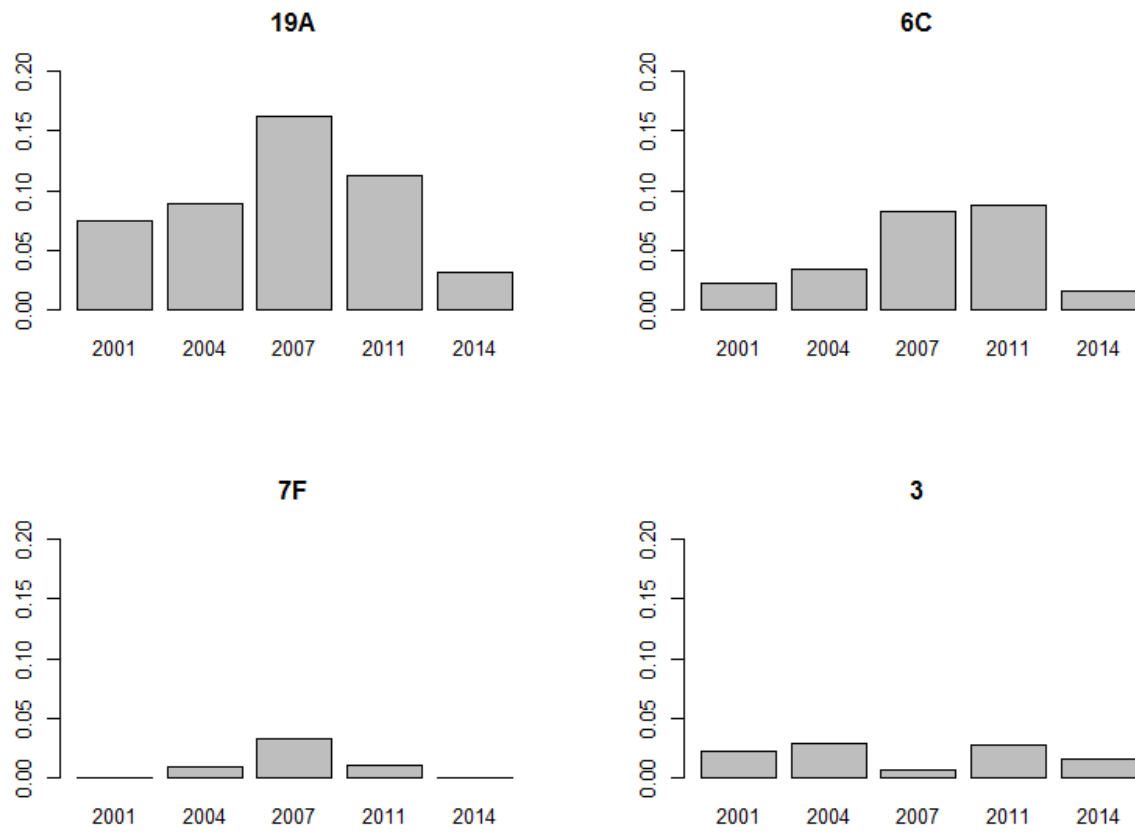

462

463 **Figure 5:** Proportion of the population in each sampling period comprised of the serotypes  
464 included in PCV-13 but not PCV-7. As a note, PCV-7 was introduced in the United States in  
465 2000 and PCV-13 was introduced in 2010.

466

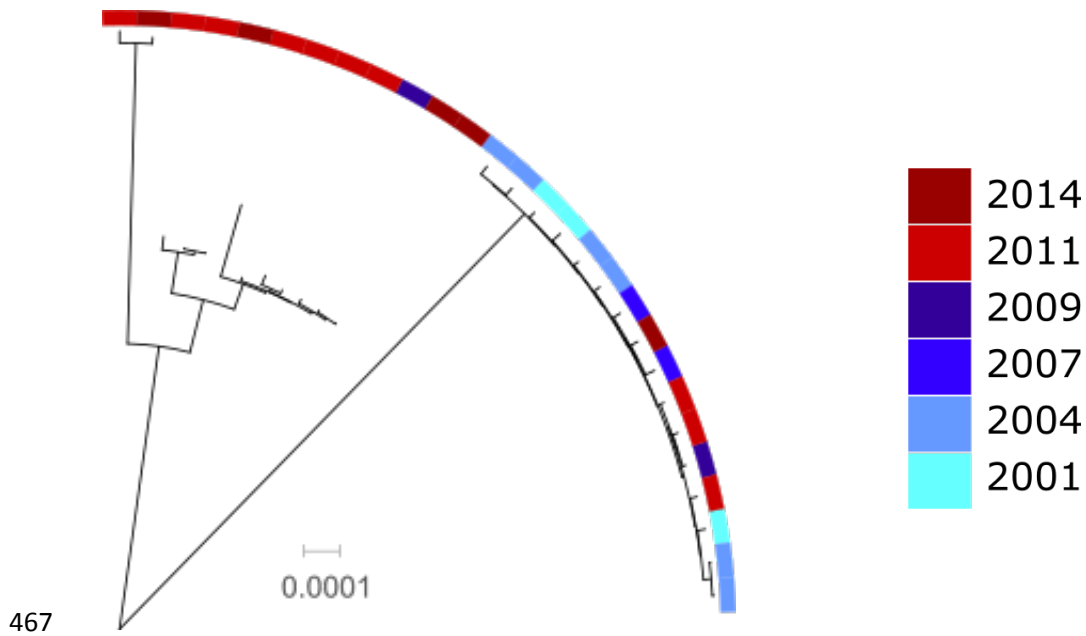

468 **Figure 6:** Serotype 3 phylogeny, with sampling period shown by color. Isolates collected before  
469 the introduction of PCV13, shown in blue, are found primarily on one monophyletic clade of the  
470 tree, while post-introduction isolates, indicated by red, are primarily on the other.

471
